# Supplementary material for: Copper-Free ‘Click’ Chemistry-Based Synthesis and Characterization of Carbonic Anhydrase-IX Anchored Albumin-Paclitaxel Nanoparticles for Targeting Tumor Hypoxia
Source: MDPI journal article supplement (doi:10.3390/ijms19030838), 2018-03-13
Supplement: s1 [file s1]

# Supplementary Materials

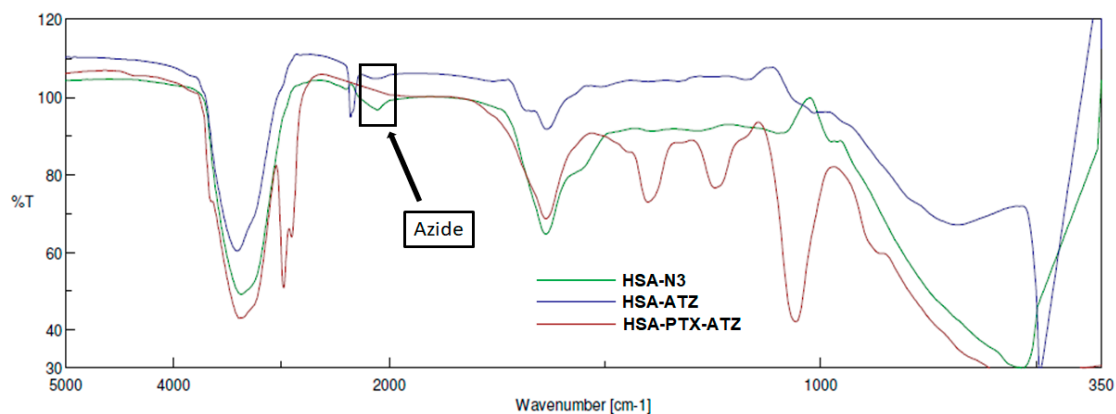

Figure S1. FTIR for the hypoxia targeting drug delivery system HSA-PTX-ATZ.

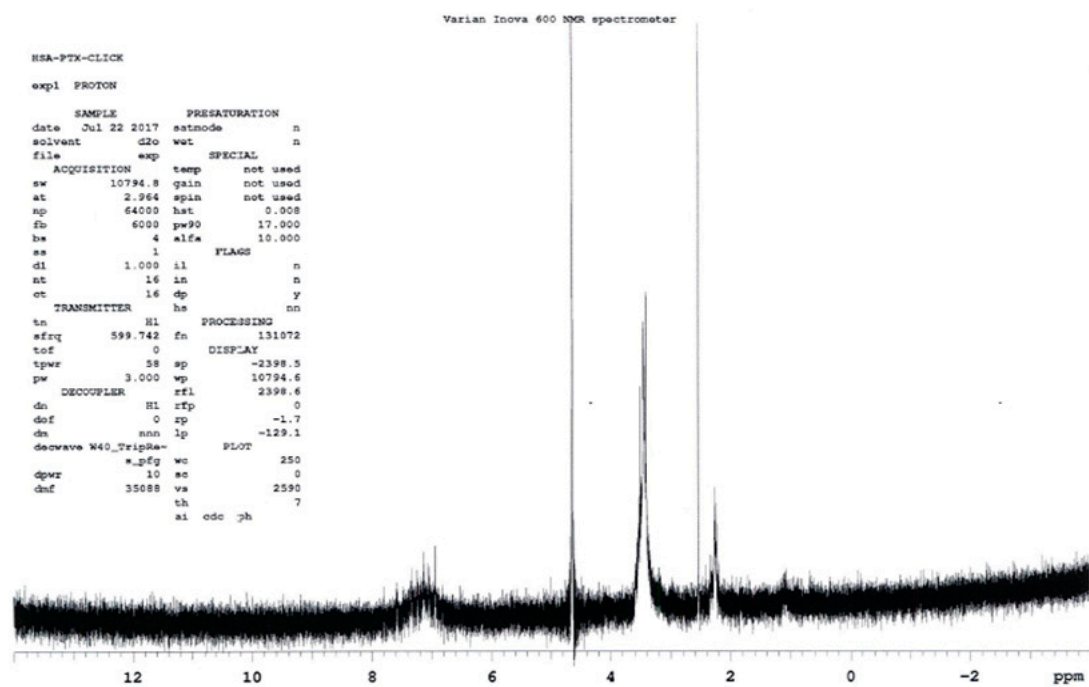

Figure S2. NMR spectrum for the hypoxia targeting drug delivery system HSA-PTX-ATZ.
